# PI3K p110 $\gamma$ Deletion Attenuates Murine Atherosclerosis by Reducing Macrophage Proliferation but Not Polarization or Apoptosis in Lesions

Teresa M. Zotes<sup>1</sup><sup>§</sup>, Cristina F. Arias<sup>1</sup><sup>§</sup><sup>‡a</sup>, José J. Fuster<sup>2</sup><sup>‡b</sup>, Roberto Spada<sup>1</sup>, Sonia Pérez-Yagüe<sup>1</sup>, Emilio Hirsch<sup>3</sup>, Matthias Wymann<sup>4</sup>, Ana C. Carrera<sup>1</sup>, Vicente Andrés<sup>2</sup>, Domingo F. Barber<sup>1</sup>\*

**1** Department of Immunology and Oncology, Centro Nacional de Biotecnología-Consejo Superior de Investigaciones Científicas (CNB-CSIC), Madrid, Spain, **2** Department of Epidemiology, Atherothrombosis and Imaging, Centro Nacional de Investigaciones Cardiovasculares (CNIC), Madrid, Spain, **3** Department of Genetics, Biology and Biochemistry, Center for Molecular Biotechnology-University of Torino, Torino, Italy, **4** Department of Clinical and Biological Sciences, Institute of Biochemistry and Genetics- University of Basel, Basel, Switzerland

## Abstract

Atherosclerosis is an inflammatory disease regulated by infiltrating monocytes and T cells, among other cell types. Macrophage recruitment to atherosclerotic lesions is controlled by monocyte infiltration into plaques. Once in the lesion, macrophage proliferation *in situ*, apoptosis, and differentiation to an inflammatory (M1) or anti-inflammatory phenotype (M2) are involved in progression to advanced atherosclerotic lesions. We studied the role of phosphoinositol-3-kinase (PI3K) p110 $\gamma$  in the regulation of *in situ* apoptosis, macrophage proliferation and polarization towards M1 or M2 phenotypes in atherosclerotic lesions. We analyzed atherosclerosis development in LDLR<sup>-/-</sup>p110 $\gamma$ <sup>+/-</sup> and LDLR<sup>-/-</sup>p110 $\gamma$ <sup>-/-</sup> mice, and performed expression and functional assays in tissues and primary cells from these and from p110 $\gamma$ <sup>+/-</sup> and p110 $\gamma$ <sup>-/-</sup> mice. Lack of p110 $\gamma$  in LDLR<sup>-/-</sup> mice reduces the atherosclerosis burden. Atherosclerotic lesions in fat-fed LDLR<sup>-/-</sup>p110 $\gamma$ <sup>-/-</sup> mice were smaller than in LDLR<sup>-/-</sup>p110 $\gamma$ <sup>+/-</sup> controls, which coincided with decreased macrophage proliferation in LDLR<sup>-/-</sup>p110 $\gamma$ <sup>-/-</sup> mouse lesions. This proliferation defect was also observed in p110 $\gamma$ <sup>-/-</sup> bone marrow-derived macrophages (BMM) stimulated with macrophage colony-stimulating factor (M-CSF), and was associated with higher intracellular cyclic adenosine monophosphate (cAMP) levels. In contrast, T cell proliferation was unaffected in LDLR<sup>-/-</sup>p110 $\gamma$ <sup>-/-</sup> mice. Moreover, p110 $\gamma$  deficiency did not affect macrophage polarization towards the M1 or M2 phenotypes or apoptosis in atherosclerotic plaques, or polarization in cultured BMM. Our results suggest that higher cAMP levels and the ensuing inhibition of macrophage proliferation contribute to atheroprotection in LDLR<sup>-/-</sup> mice lacking p110 $\gamma$ . Nonetheless, p110 $\gamma$  deletion does not appear to be involved in apoptosis, in macrophage polarization or in T cell proliferation.

**Citation:** Zotes TM, Arias CF, Fuster JJ, Spada R, Pérez-Yagüe S, et al. (2013) PI3K p110 $\gamma$  Deletion Attenuates Murine Atherosclerosis by Reducing Macrophage Proliferation but Not Polarization or Apoptosis in Lesions. PLoS ONE 8(8): e72674. doi:10.1371/journal.pone.0072674

**Editor:** Esther Lutgens, University of Amsterdam Academic Medical Center, Netherlands

**Received:** November 8, 2012; **Accepted:** July 17, 2013; **Published:** August 22, 2013

**Copyright:** © 2013 Zotes et al. This is an open-access article distributed under the terms of the Creative Commons Attribution License, which permits unrestricted use, distribution, and reproduction in any medium, provided the original author and source are credited.

**Funding:** This work was supported by the Spanish Ministry of Science and Innovation (SAF-2007-60498, SAF-2008-00471, SAF-2011-23639 to DFB, SAF2010-16044 to VA, AP2007-01711 to TMZ, BES-2009-016547 to RS), the Research Network in Inflammation and Rheumatic Diseases (RIER) of the ISCIII-MSPS Cooperative Research Thematic Network program (RD08/0075/0015 to DFB), the Madrid Regional Government (200520M040 to DFB) and the Thematic Research Network in Cardiovascular Diseases (RECAVA; RD06/0014/0021 to VA). The funders had no role in study design, data collection and analysis, decision to publish, or preparation of the manuscript.

**Competing Interests:** The authors have declared that no competing interests exist.

\* E-mail: dfbarber@cnb.csic.es

<sup>‡a</sup> Current address: Langone Medical Center, New York University, New York, New York, United States of America

<sup>‡b</sup> Current address: Whitaker Cardiovascular Institute, Boston University School of Medicine, Boston, Massachusetts, United States of America

<sup>§</sup> These authors contributed equally to this work.

## Introduction

Atherosclerosis has traditionally been considered a disorder of cholesterol metabolism that results in lipid accumulation in the arterial wall, provoking artery wall thickening. It shares features of chronic inflammatory diseases, such as infiltration of activated immune cells into the artery wall [1], [2]. Early in the disease, oxidized low-density lipoproteins (oxLDL) that have accumulated in the intima activate endothelial cells; these secrete a number of pro-inflammatory molecules that recruit specific leukocyte types into the artery wall [3]. Monocyte/macrophages accumulate preferentially in atherosclerotic plaque, although other infiltrate components such as effector T cells, mast cells, dendritic cells and

neutrophils also contribute to inflammation [3], [4], [5]. Small numbers of Foxp3<sup>+</sup> regulatory T (Treg) cells, which mediate atheroprotection [5], are also present in plaques [6]. In early atherosclerotic lesions, most monocytes differentiate to macrophages due to the effect of macrophage colony-stimulating factor (M-CSF) and other mediators of innate and acquired immunity [7]. Neointimal macrophages internalize lipoproteins to become foam cells, which contribute to lipoprotein modification and retention, enhancing atherosclerosis progression [4], [7]. Macrophage and T lymphocyte activation lead to the release of additional mediators, including cytokines, chemokines and growth factors [1], [8]. This chronic inflammatory environment promotes progression of early lesions (or fatty streaks) to complex lesions (or

advanced plaques) that protrude into the arterial lumen and can trigger atherothrombotic vascular disease [1], [3].

Macrophages are a heterogeneous cell population, able to adapt their physiology in response to a variety of microenvironmental situations. There are thought to be two main phenotypes; classically activated macrophages (M1) are pro-inflammatory, whereas alternatively-activated macrophages (M2) contribute to wound healing and regulation of inflammatory processes [9]. Granulocyte and macrophage colony-stimulating factor (GM-CSF)-stimulated bone marrow precursors generate cells of the M1 phenotype, whereas M-CSF promotes the M2 phenotype [10], [11]; studies describe both cell types in human and murine atherosclerotic lesions [12]. A recent report nonetheless showed predominance of infiltrating M2 macrophages in lesions in young apolipoprotein E (ApoE)-deficient mice, while M1 macrophages dominated in those of aged ApoE-deficient mice; further analysis suggested M2-to-M1 transition in the lesions [13].

Macrophage number in the lesions is controlled mainly by monocyte migration into plaques and, to a lesser extent, by macrophage apoptosis and by local macrophage proliferation [14], [15], [16]. Macrophage apoptosis has contrasting roles in plaque progression; in early lesions, it limits lesion cellularity, whereas in advanced lesions, it promotes development of the necrotic core, a

high-risk factor for thrombosis [16]. Proliferation of infiltrating macrophages in early atherosclerotic plaque fosters lesion progression to a more advanced stage [14], [15], [17]. In lesions, modified LDL (low-density lipoproteins) induce GM-CSF release by infiltrating macrophages and by vascular endothelial and smooth muscle cells, which activates macrophage proliferation [17], [18], [19]. Although GM-CSF and phosphoinositide 3-kinase (PI3K) are implicated in macrophage proliferation *in vitro* [17], [20], Chang *et al.* did not detect GM-CSF by *in situ* hybridization in atherosclerotic plaque sections from ApoE-deficient mice [21]. M-CSF secreted by aortic endothelial cells also promotes macrophage proliferation in atherosclerotic lesions [14]. In murine bone marrow-derived macrophages (BMM) and in human monocytes, M-CSF induces recruitment of the PI3K p85 $\alpha$  regulatory subunit to the M-CSF receptor, activating PI3K [22], [23], [24].

p110 $\gamma$  is expressed mainly in hematopoietic cells. p110 $\gamma$ <sup>-/-</sup> mouse neutrophils have severely impaired function and migration; these mice also show reduced mast cell degranulation [25], lower thymocyte numbers and defective T cell function *in vitro* and *in vivo* [26], [27], [28]. Germ-line deletion of p110 $\gamma$  in ApoE<sup>-/-</sup> mice attenuates murine atherosclerosis [21]. *In vitro* and *in vivo* experiments showed that p110 $\gamma$  is necessary for Akt activation in

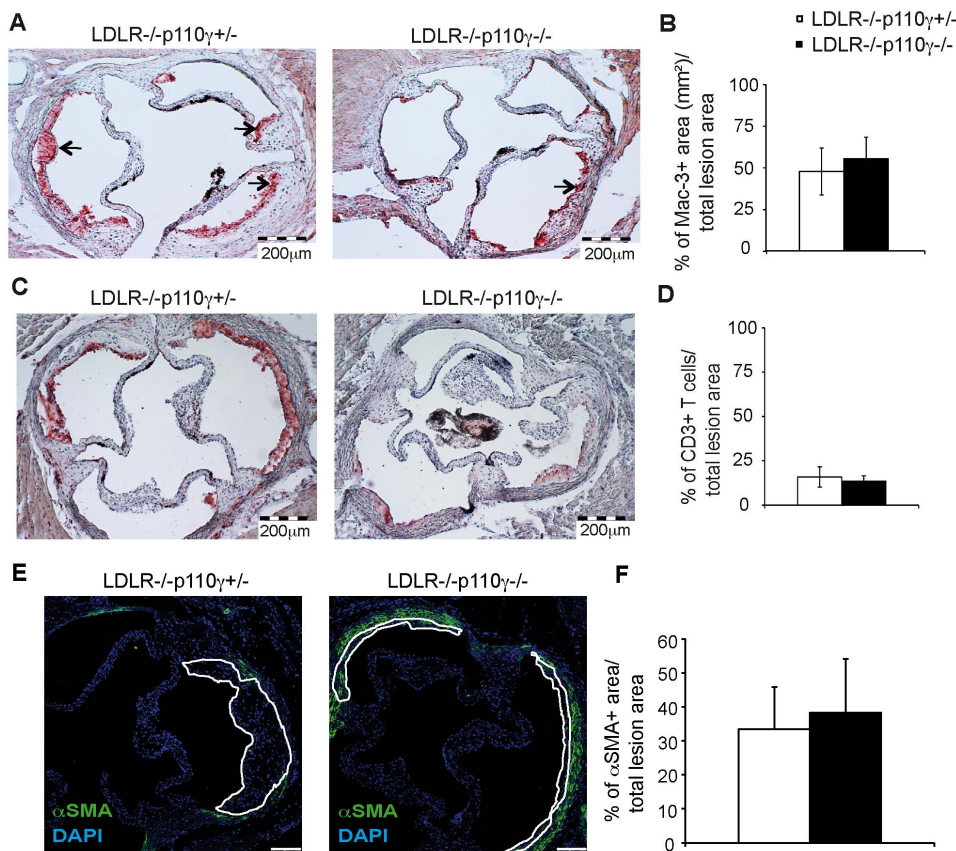

**Figure 1. Macrophage and T cell infiltration in lesions of LDLR<sup>-/-</sup>p110 $\gamma$ <sup>-/-</sup> compared to LDLR<sup>-/-</sup>p110 $\gamma$ <sup>+/-</sup> mice.** Aortic sinus sections were studied in LDLR<sup>-/-</sup>p110 $\gamma$ <sup>+/-</sup> (females,  $n=6$ ) and LDLR<sup>-/-</sup>p110 $\gamma$ <sup>-/-</sup> mice (females,  $n=7$ ) after two months on a high-fat diet. **(A)** Representative photomicrographs of Mac-3<sup>+</sup> cells in aortic sinus sections after immunohistochemical staining. Bar=200  $\mu$ m. Arrows indicate Mac-3<sup>+</sup> area. **(B)** Percentage of Mac-3<sup>+</sup>-stained area relative to total lesion area, quantified with ImageJ software. **(C)** Representative photomicrographs of CD3<sup>+</sup> cells in aortic sinus sections after immunohistochemical staining. Bar=200  $\mu$ m. **(D)** Percentage of CD3<sup>+</sup> cells relative to total lesion area, quantified with ImageJ. **(E)** Representative photomicrographs of immunofluorescent staining for vascular smooth muscle cells ( $\alpha$ SMA<sup>+</sup>) in aortic sinus sections from LDLR<sup>-/-</sup>p110 $\gamma$ <sup>+/-</sup> and LDLR<sup>-/-</sup>p110 $\gamma$ <sup>-/-</sup> mice after two months on a high-fat diet ( $n=6$  females/genotype). Bar=100  $\mu$ m. **(F)** Percentage of  $\alpha$ SMA<sup>+</sup> area relative to total lesion area, quantified with ImageJ. Mean  $\pm$  SD. Student's *t*-test. doi:10.1371/journal.pone.0072674.g001

macrophages in response to oxLDL, atherogenic chemokines, and angiotensin II activation [21]. Pharmacological inhibition of p110 $\gamma$  alleviates atherosclerotic plaque development in ApoE $^{-/-}$  and LDLR $^{-/-}$  mice; its deletion in hematopoietic cells decreases macrophage and T cell numbers in plaque [29]. The *in vivo* mechanism underlying this reduced inflammatory cell infiltration has not been entirely clarified. Although M-CSF-stimulated p110 $\gamma$ -deficient BMM show reduced migration rates *in vitro* [30], p110 $\gamma$  deletion does not affect monocyte differentiation to macrophages [31]. p110 $\gamma$  regulates cyclic adenosine monophosphate (cAMP) levels in cardiomyocytes through a kinase-independent pathway that involves formation of a complex that includes p110 $\gamma$ , its p84/p87<sup>PIKAP</sup> regulatory subunit, and the protein phosphodiesterase3B (PDE3B); this complex controls PDE3B-mediated cAMP hydrolysis [32], [33]. A similar p110 $\gamma$ -dependent mechanism was recently shown to mediate microglial phagocytosis via lipid kinase-independent control of cAMP [34]. It is not known whether p110 $\gamma$  regulates cAMP intracellular levels in macrophages. Macrophage proliferation is nonetheless affected by intracellular cAMP levels, as high levels are associated with cell cycle arrest [35]. In addition, cAMP response element binding protein (CREB) is linked to macrophage polarization to the M2 phenotype, thus connecting cAMP and M1/M2 macrophage polarization [36].

Here we examined the influence of p110 $\gamma$  deletion on macrophage proliferation, apoptosis and polarization in atherosclerotic plaque, and tested whether p110 $\gamma$  deletion contributes to lesion reduction in LDLR $^{-/-}$  mice. We identify a p110 $\gamma$  function in macrophage proliferation within atherosclerotic lesions, a mechanism that contributes to atheroprotection in LDLR $^{-/-}$  mice lacking p110 $\gamma$ .

## Materials and Methods

### Mice and Ethics Statement

Gene targeting in embryonic cells was used to generate LDLR $^{-/-}$  mice [37] (Ldlr<sup>tm1Her</sup> version2; Jackson Laboratories). p110 $\gamma$  $^{-/-}$  mice [38] were maintained in heterozygosity. We backcrossed LDLR $^{-/-}$  with p110 $\gamma$  $^{+/+}$  and p110 $\gamma$  $^{-/-}$  mice for at least 7 generations; 12- to 15-week-old mice were fed for two months with a high-fat diet (15.2% fat, containing 7.5 g/kg cholesterol (0.75% cholesterol); Ssniff Spezialdiäten GmbH, Figure S1A). Mice were bred and maintained in specific pathogen-free conditions in our animal facility; the CNB Ethics Committee for Animal Experimentation approved all animal studies (ref: 11021), in compliance with national and European Union legislation (Directive 2010/63/EU).

### Analysis of Macrophage and T cell Infiltration in Atherosclerotic Lesions

At t=2 months of high-fat diet, mice were anesthetized (ketamine, 150 mg/kg; xylazine, 10 mg/kg; i.p.). Tail- and toe-pinch reflexes were tested to monitor adequacy of anesthesia and all efforts were made to minimize suffering. Whole blood was extracted by retro-orbital bleeding and hearts perfused with 4% paraformaldehyde. Hearts were extracted and paraffin-embedded. Some serial sections were stained by immunohistochemistry for T cells (CD3<sup>+</sup>), macrophages (Mac-3<sup>+</sup>) and regulatory T cells (Foxp3<sup>+</sup>) (see Supplement S1 for details).

### *In vivo* Determination of Macrophage and T cell Proliferation

Macrophage and T cell proliferation was analyzed by immunofluorescence staining of the aortic valve region in paraffin-

embedded sections from LDLR $^{-/-}$ p110 $\gamma$  $^{+/+}$  and LDLR $^{-/-}$ p110 $\gamma$  $^{-/-}$  mice fed with a high-fat diet for two months. Markers were Mac-3 (macrophages), CD3 (T cells) and Ki67 (proliferation) (details in Supplement S1).

### *In vivo* Study of M1 and M2 Macrophages

M1 (Mac-3<sup>+</sup>iNOS<sup>+</sup>) and M2 (Mac-3<sup>+</sup>arginase1<sup>+</sup>) macrophages were analyzed by immunofluorescence staining of paraffin-embedded sections of the aortic valve region from LDLR $^{-/-}$ p110 $\gamma$  $^{+/+}$  and LDLR $^{-/-}$ p110 $\gamma$  $^{-/-}$  mice after a two-month high-fat diet (see Supplement S1).

### *In vivo* Determination of Lesion Apoptosis and of Vascular Smooth Muscle Cells

Lesion apoptosis was analyzed by TUNEL and cleaved caspase-3 immunofluorescence staining of the aortic valve region in paraffin-embedded sections from LDLR $^{-/-}$ p110 $\gamma$  $^{+/+}$  and LDLR $^{-/-}$ p110 $\gamma$  $^{-/-}$  mice fed a high-fat diet for two months. Vascular smooth muscle cell (VSMC) staining was analyzed by anti-alpha smooth muscle actin ( $\alpha$ SMA) immunofluorescence staining of similar sections (details in Supplement S1).

### Macrophage Cell Cycle Analysis

BMM were synchronized in G0/G1 by M-CSF deprivation (36 h) and then stimulated for different times with M-CSF, collected and labeled with propidium iodide to analyze cell cycle by flow cytometry (see Supplement S1).

### Analysis of Intracellular cAMP Concentrations

BMM from LDLR $^{-/-}$ p110 $\gamma$  $^{+/+}$  and LDLR $^{-/-}$ p110 $\gamma$  $^{-/-}$  mice were differentiated *in vitro* and intracellular cAMP concentration determined by ELISA using the Parameter Cyclic AMP Assay kit (KGE002B, R&D Systems) (see Supplement S1).

In a second approach, BMM from LDLR $^{-/-}$ p110 $\gamma$  $^{+/+}$  and LDLR $^{-/-}$ p110 $\gamma$  $^{-/-}$  mice were differentiated *in vitro* and M-CSF-stimulated at several times (0, 24, 48 h). Cells were washed, lysed and protein quantified. Western blot was developed to detect protein-bound cAMP, phospho-CREB (p-CREB) and total CREB with anti-cAMP antibody (clone SPM486; Abcam, Cambridge, UK; this antibody was generated using cAMP compounds as immunogen, and a chemically linked cAMP-carrier protein for antibody screening (see Supplement S1), as well as anti-pCREB (Ser133) and -CREB (both from Cell Signaling, Danvers, MA).  $\beta$ -actin was used as loading control (clone AC-15, Sigma); band intensity was quantified using ImageJ software. As a positive control, BMM from p110 $\gamma$  $^{+/+}$  mice were differentiated *in vitro* and forskolin (FSK)-stimulated, and cAMP was detected in Western blot (see Supplement S1).

### M1 and M2 Macrophage Differentiation

After BMM differentiation (see Supplement S1), cells were plated in 6-well plates ( $1-2 \times 10^6$  cells/well) and incubated (24 h) in complete DMEM (10% FBS, antibiotics, 2 mM glutamine) and 10 ng/ml IL-4 (Peprotech, Rocky Hill, NJ) for M2 macrophage differentiation, or 10 ng/ml IFN $\gamma$  (Peprotech) and 100 ng/ml lipopolysaccharide (LPS; Sigma) for M1 macrophage differentiation. Cells were washed in cold PBS, resuspended in 0.6 to 1 ml TRI Reagent (Sigma), and stored at  $-80^{\circ}\text{C}$  for RNA extraction.

### qRT-PCR Analysis of M1 and M2 Macrophage Marker Expression

RNA was extracted from M1- or M2-differentiated BMM from p110 $\gamma$  $^{+/+}$  and p110 $\gamma$  $^{-/-}$  mice. qRT-PCR was performed using

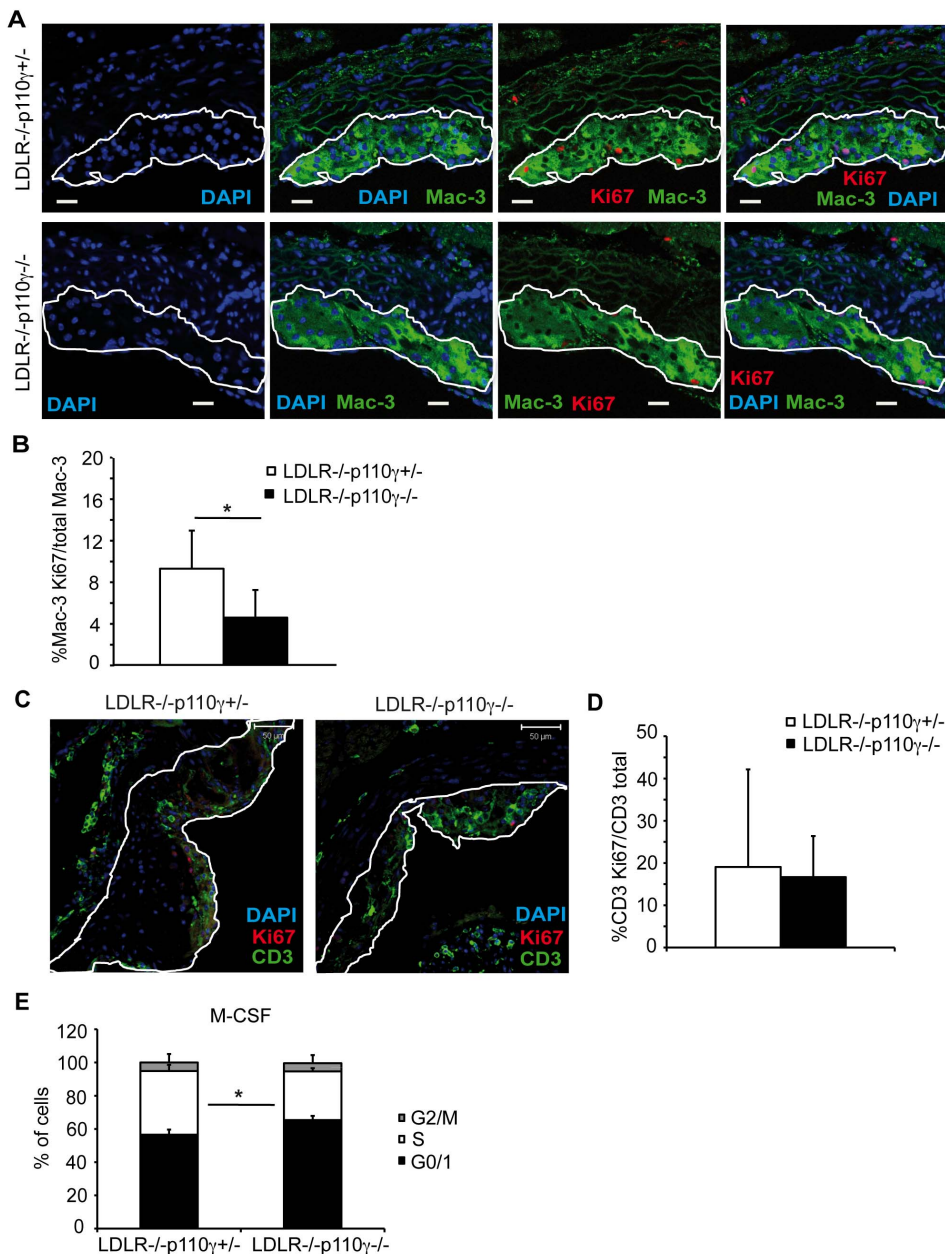

**Figure 2. Macrophage proliferation in aortic plaque is impaired in LDLR<sup>-/-</sup>p110 $\gamma$ <sup>-/-</sup> mice whereas T cell proliferation is unaffected.** Atherosclerotic plaques were studied in LDLR<sup>-/-</sup>p110 $\gamma$ <sup>+/-</sup> (female,  $n=5$ ) and LDLR<sup>-/-</sup>p110 $\gamma$ <sup>-/-</sup> (female,  $n=6$ ) mice after two months on a high-fat diet. **(A)** Representative photomicrographs of immunofluorescent staining for macrophage proliferation in aortic sections. Bar=30  $\mu$ m. **(B)** Percentage of proliferating relative to total macrophages in lesion area. **(C)** Representative photomicrographs of immunofluorescent staining for T cell proliferation in aortic sections. Bar=50  $\mu$ m. **(D)** Percentage of proliferating T cells relative to total T cells in lesion area, quantified with ImageJ. **(E)** Percentage of bone marrow-derived macrophages (BMM) in G2/M, S and G0/G1 phases at 26 h post-M-CSF stimulation in LDLR<sup>-/-</sup>p110 $\gamma$ <sup>+/-</sup> and LDLR<sup>-/-</sup>p110 $\gamma$ <sup>-/-</sup> mice ( $n=3$  experiments, each with a pool of 3 mice/genotype). Mean  $\pm$  SD; Student's  $t$ -test,  $p<0.05$  (for B, D, E). doi:10.1371/journal.pone.0072674.g002

specific primers for M1 (iNOS, IL-12) and M2 markers (arginase1, YM1, IL-10) (see Supplement S1).

### Statistical Analysis

Data are represented as mean  $\pm$  SD. Most statistical analyses were performed using Student's  $t$ -test to compare distinct parameters in two independent mouse groups (LDLR<sup>-/-</sup>p110 $\gamma$ <sup>+/-</sup> and LDLR<sup>-/-</sup>p110 $\gamma$ <sup>-/-</sup> or p110 $\gamma$ <sup>+/-</sup> and p110 $\gamma$ <sup>-/-</sup>). Where indicated, data obtained by counting and small sample

analysis were compared by the Poisson test. In all cases, differences were considered significant for  $p<0.05$  (\* $p<0.05$ , \*\* $p<0.01$ ).

### Results

#### Lack of p110 $\gamma$ in LDLR<sup>-/-</sup> Mice Reduces Atherosclerosis Burden

To determine the effect of PI3K p110 $\gamma$  deletion on apoptosis, macrophage proliferation and polarization in atherosclerotic lesions, we generated LDLR<sup>-/-</sup> mice lacking one (LDLR<sup>-/-</sup>

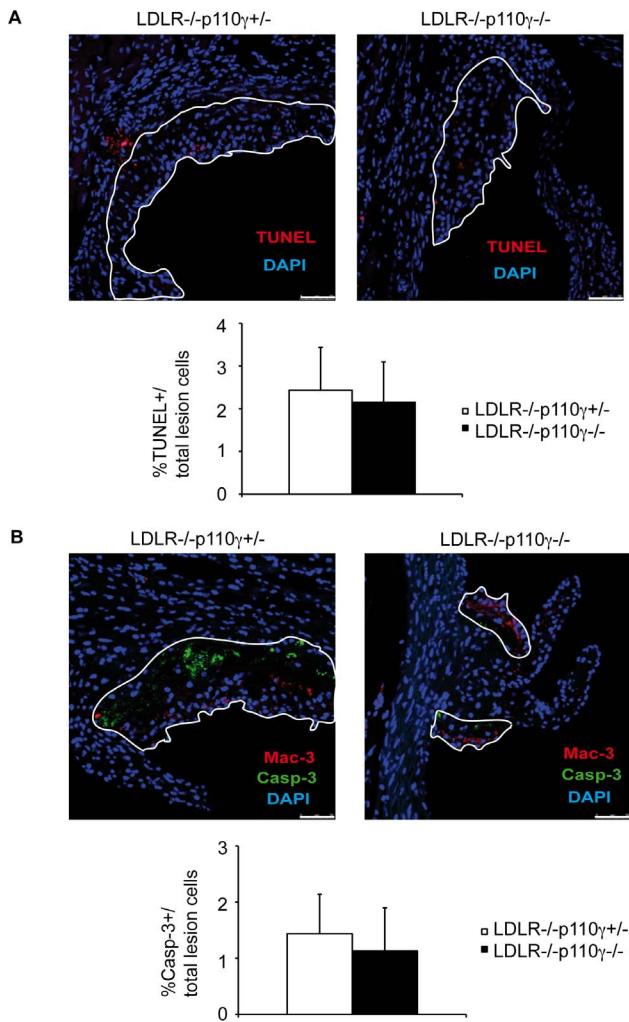

**Figure 3. Lesion apoptosis is unaffected by p110 $\gamma$  deletion.** Atherosclerotic plaques were analyzed in LDLR<sup>-/-</sup>p110 $\gamma$ <sup>+/-</sup> and LDLR<sup>-/-</sup>p110 $\gamma$ <sup>-/-</sup> mice after a two-month high-fat diet. (A) Representative photomicrographs of TUNEL immunofluorescent staining for lesion apoptosis in aortic sections from LDLR<sup>-/-</sup>p110 $\gamma$ <sup>+/-</sup> (n=8) and LDLR<sup>-/-</sup>p110 $\gamma$ <sup>-/-</sup> mice (n=8) (top); percentage of TUNEL<sup>+</sup> relative to total cells in the delimited lesion area (bottom). Bar=50  $\mu$ m. (B) Representative photomicrographs of cleaved caspase-3 immunofluorescent staining for lesion apoptosis in aortic sections from LDLR<sup>-/-</sup>p110 $\gamma$ <sup>+/-</sup> (n=5) and LDLR<sup>-/-</sup>p110 $\gamma$ <sup>-/-</sup> mice (n=5) (top); percentage of cleaved caspase-3<sup>+</sup> relative to total cells in the delimited lesion area (bottom). Bar=50  $\mu$ m. Mean  $\pm$  SD; Student's *t*-test. doi:10.1371/journal.pone.0072674.g003

p110 $\gamma$ <sup>+/-</sup>) or both p110 $\gamma$  alleles (LDLR<sup>-/-</sup>p110 $\gamma$ <sup>-/-</sup>). Mice of both genotypes were fed a high-fat diet for two months to induce the disease. We analyzed atherosclerosis burden by planimetric analysis of hematoxylin/eosin-stained cross-sections of the aortic sinus. Lesion size was smaller in LDLR<sup>-/-</sup>p110 $\gamma$ <sup>-/-</sup> than in LDLR<sup>-/-</sup>p110 $\gamma$ <sup>+/-</sup> mice (Supplement S1, Figure S1B, S1C). To evaluate the number of infiltrating macrophages, T cells and regulatory T cells in p110 $\gamma$  deletion conditions, we stained aortic sinus sections from these mice with macrophage-, T cell- and Treg-specific markers (Mac-3<sup>+</sup>, CD3<sup>+</sup> and Foxp3<sup>+</sup>, respectively). We observed a significant decrease in Mac-3<sup>+</sup>-stained area in LDLR<sup>-/-</sup>p110 $\gamma$ <sup>-/-</sup> compared to LDLR<sup>-/-</sup>p110 $\gamma$ <sup>+/-</sup> lesions (Figure 1A, S1D). The absolute number of CD3<sup>+</sup> T cells was similarly reduced in LDLR<sup>-/-</sup>p110 $\gamma$ <sup>-/-</sup> compared to LDLR<sup>-/-</sup>

p110 $\gamma$ <sup>+/-</sup> lesions (Figure 1C, S1E). Foxp3<sup>+</sup> staining was negligible in LDLR<sup>-/-</sup>p110 $\gamma$ <sup>+/-</sup> lesions (0–3 cells/section) and absent in LDLR<sup>-/-</sup>p110 $\gamma$ <sup>-/-</sup> lesions (n=8 mice/genotype, Table S1). Nonetheless, because lesions were smaller in LDLR<sup>-/-</sup>p110 $\gamma$ <sup>-/-</sup> than in LDLR<sup>-/-</sup>p110 $\gamma$ <sup>+/-</sup> mice, Mac-3<sup>+</sup>-stained area and CD3<sup>+</sup> cell number relative to total lesion area were similar in LDLR<sup>-/-</sup>p110 $\gamma$ <sup>-/-</sup> and LDLR<sup>-/-</sup>p110 $\gamma$ <sup>+/-</sup> mice (Figure 1B, 1D). We also stained vascular smooth muscle cell (VSMC) using  $\alpha$ SMA antibody (Figure 1E). As indicated by the ratio of  $\alpha$ SMA<sup>+</sup> area/total lesion area, we found no differences between LDLR<sup>-/-</sup>p110 $\gamma$ <sup>-/-</sup> and LDLR<sup>-/-</sup>p110 $\gamma$ <sup>+/-</sup> mice (Figure 1F).

### p110 $\gamma$ Deficiency Reduces Macrophage but not T cell Proliferation in Atherosclerotic Lesions

Macrophage proliferation in lesions enhances atherosclerosis progression to more advanced disease stages [15]. To determine whether the reduced atherosclerosis burden in LDLR<sup>-/-</sup>p110 $\gamma$ <sup>-/-</sup> mice correlated with cell proliferation defects in lesions, we performed double immunofluorescence experiments in aortic cross-sections from high-fat diet-fed mice to test whether p110 $\gamma$  deficiency affected macrophage and T cell *in situ* proliferation (as assessed by Ki67 expression). These studies showed a significant reduction in the number of proliferating neointimal macrophages in LDLR<sup>-/-</sup>p110 $\gamma$ <sup>-/-</sup> compared to LDLR<sup>-/-</sup>p110 $\gamma$ <sup>+/-</sup> mice (Figure 2A, 2B). In contrast, p110 $\gamma$  deletion did not affect T cell proliferation (Figure 2C, 2D).

M-CSF is thought to play an important role in inducing macrophage proliferation in atherosclerotic lesions [14]. Cell cycle analysis of *in vitro*-differentiated BMM from LDLR<sup>-/-</sup>p110 $\gamma$ <sup>+/-</sup> and LDLR<sup>-/-</sup>p110 $\gamma$ <sup>-/-</sup> mice allowed us to identify the proportion of cells in G0/G1, S and G2/M phases at various times post-stimulation with M-CSF. The proportion of S phase cells was reduced in LDLR<sup>-/-</sup>p110 $\gamma$ <sup>-/-</sup> compared to LDLR<sup>-/-</sup>p110 $\gamma$ <sup>+/-</sup> macrophages at 26 h after M-CSF-stimulation (Figure 2E), suggesting a role for p110 $\gamma$  in macrophage cell cycle progression. In contrast, cell cycle assays to study *in vitro* BMM proliferation in response to GM-CSF showed no differences between p110 $\gamma$ <sup>+/-</sup> and p110 $\gamma$ <sup>-/-</sup> BMM (Figure S2).

### Lesion Apoptosis is Unaffected by p110 $\gamma$ Deletion

Macrophage apoptosis has been implicated in plaque progression [16]. We measured total apoptosis in lesions by TUNEL (Figure 3A) and cleaved caspase-3 (Figure 3B) immunofluorescent staining of aortic sinus sections from LDLR<sup>-/-</sup>p110 $\gamma$ <sup>+/-</sup> and LDLR<sup>-/-</sup>p110 $\gamma$ <sup>-/-</sup> mice. Lesion area was delimited for TUNEL staining with the help of smooth muscle cells (SMC), which limit lesion area and are autofluorescent, and for cleaved caspase-3 staining by adding Mac-3 staining to the SMC guide; some lesion apoptotic cells are not Mac-3<sup>+</sup>. We detected a tendency toward lower apoptotic rates in LDLR<sup>-/-</sup>p110 $\gamma$ <sup>-/-</sup> compared to LDLR<sup>-/-</sup>p110 $\gamma$ <sup>+/-</sup> mice (Figure 3A, 3B), although the differences were not significant.

### Reduced LDLR<sup>-/-</sup>p110 $\gamma$ <sup>-/-</sup> Macrophage Proliferation Correlates with Increased Intracellular Basal cAMP Levels

Since p110 $\gamma$  regulates cAMP levels in cardiomyocytes and microglia [32], [33], [34] we tested whether this is the case in macrophages, using ELISA to measure intracellular cAMP levels in LDLR<sup>-/-</sup>p110 $\gamma$ <sup>+/-</sup> and LDLR<sup>-/-</sup>p110 $\gamma$ <sup>-/-</sup> mouse BMM. Basal cAMP levels were higher in LDLR<sup>-/-</sup>p110 $\gamma$ <sup>-/-</sup> compared to LDLR<sup>-/-</sup>p110 $\gamma$ <sup>+/-</sup> BMM (Figure 4A). In an alternative approach, we measured differences in protein-bound cAMP in

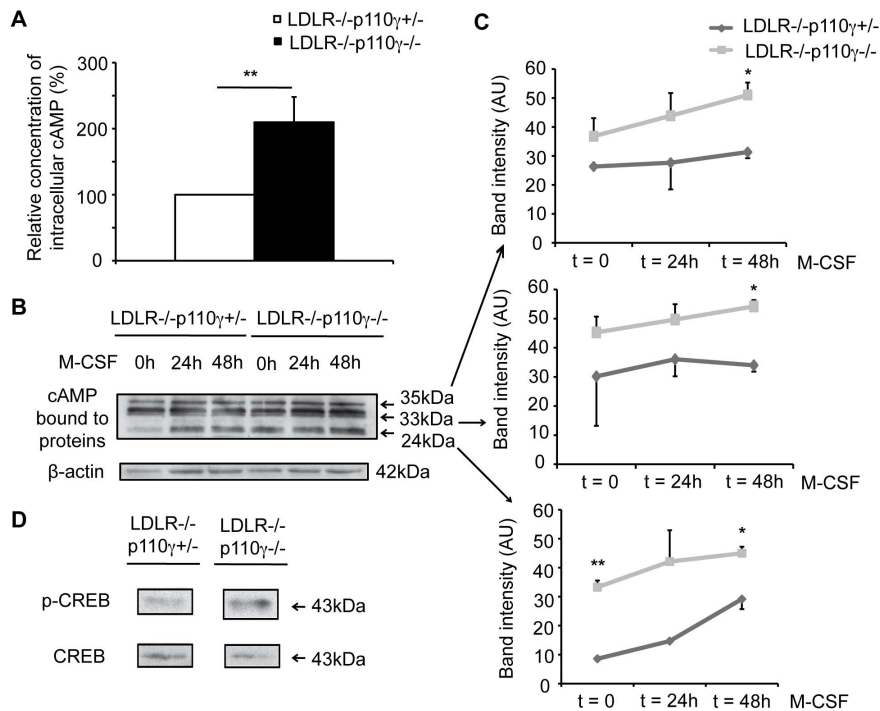

**Figure 4. Intracellular cAMP levels are higher in  $LDLR^{-/-}p110\gamma^{-/-}$  than in  $LDLR^{-/-}p110\gamma^{+/+}$  macrophages.**  $LDLR^{-/-}p110\gamma^{+/+}$  and  $LDLR^{-/-}p110\gamma^{-/-}$  BMM were allowed to differentiate and were lysed. (A) ELISA was used to determine intracellular cAMP levels in unstimulated BMM lysates ( $t=0$ ). The graph shows basal intracellular cAMP levels in  $LDLR^{-/-}p110\gamma^{-/-}$  vs.  $LDLR^{-/-}p110\gamma^{+/+}$  BMM ( $n=4$  experiments). Mean  $\pm$  SD; Student's  $t$ -test,  $p<0.01$ . (B) Western blot of BMM extracts to detect protein-bound cAMP after M-CSF stimulation (0, 24 and 48 h). (C) Bands in (B) were quantified with ImageJ and measured as arbitrary units (AU). Mean  $\pm$  SD of four independent experiments, each with one mouse/genotype. Student's  $t$ -test,  $p<0.05$  and  $p<0.01$ . (D) Western blot of BMM extracts to detect p-CREB and total CREB ( $t=0$ ). doi:10.1371/journal.pone.0072674.g004

Western blot, using an antibody that recognizes protein-bound cAMP [39]. In macrophages, this antibody recognizes major three bands of 24, 33 and 35 kDa, as determined when BMM from  $p110\gamma^{+/+}$  mice were differentiated *in vitro* and FSK-stimulated, and cAMP detected by Western blot (Figure S3). Again, basal cAMP levels were significantly higher in BMM lysates from  $LDLR^{-/-}p110\gamma^{-/-}$  than from  $LDLR^{-/-}p110\gamma^{+/+}$  mice and this difference was sustained after M-CSF stimulation (Figure 4B, 4C).

In macrophages, signals that increase intracellular cAMP induce phosphorylation of cAMP response element-binding protein (CREB) [40]. As an alternative measurement of cAMP levels, we tested CREB phosphorylation status in  $LDLR^{-/-}p110\gamma^{+/+}$  and  $LDLR^{-/-}p110\gamma^{-/-}$  mouse BMM. Coincident with the increased cAMP detected in the protein lysates, we found higher basal p-CREB levels in  $LDLR^{-/-}p110\gamma^{-/-}$  mouse BMM (Figure 4D). The data suggest that lack of  $p110\gamma$  in macrophages promotes intracellular cAMP accumulation, which correlates with G0/G1 cell cycle arrest in  $LDLR^{-/-}p110\gamma^{-/-}$  mouse BMM (Figure 2E) since high cAMP levels are associated with cell cycle arrest [35].

#### $p110\gamma$ Deficiency does not Affect Macrophage Polarization to M1 and M2 Phenotypes

cAMP is linked to macrophage transition to the M2 phenotype [36]. As we observed increased cAMP levels in  $LDLR^{-/-}p110\gamma^{-/-}$  BMM, we analyzed macrophage polarization in atherosclerotic lesions. Immunofluorescence experiments showed no significant differences in the percentage of M1 (iNOS<sup>+</sup>) and M2 (arginase1<sup>+</sup>) macrophages in aortic sinus cross-sections from  $LDLR^{-/-}p110\gamma^{+/+}$  and  $LDLR^{-/-}p110\gamma^{-/-}$  mice (Figure 5A,

5B), although there was a tendency toward more M2 macrophages in  $LDLR^{-/-}p110\gamma^{-/-}$  mice. Consistent with this finding, qRT-PCR studies of  $p110\gamma^{+/+}$  and  $p110\gamma^{-/-}$  mouse BMM stimulated *in vitro* (24 h) towards the M1 (IFN $\gamma$ +LPS) or M2 phenotypes (IL-4) showed no significant differences in M1 (iNOS, IL-12) and M2 (arginase1, IL-10, YMI) marker expression (Figure 5C, 5D).

#### Discussion

PI3K  $p110\gamma$  is implicated in atherosclerosis, as its genetic deletion in ApoE<sup>-/-</sup> mice leads to reduced plaque size and impaired activation of the PI3K/Akt pathway in neointimal macrophages [21]. Pharmacological inhibition of  $p110\gamma$  reduces atherosclerosis in ApoE<sup>-/-</sup> and  $LDLR^{-/-}$  mice, and reconstitution of  $LDLR^{-/-}$  mice with  $p110\gamma^{-/-}$  mouse bone marrow leads to decreased T cell and monocyte infiltration in atherosclerotic plaques [29]. Whether  $p110\gamma$  deletion also contributes to local macrophage proliferation and apoptosis nonetheless remains unclear, as does the role of  $p110\gamma$  in M1/M2 macrophage differentiation. In this study, we approached these questions by analyzing atherosclerosis development in  $LDLR^{-/-}p110\gamma^{-/-}$  mice.

Immune cell infiltration is an important step in plaque formation and progression [5]. In agreement with previous studies [21], [29], we found smaller aortic sinus lesions in  $LDLR^{-/-}p110\gamma^{-/-}$  than in  $LDLR^{-/-}p110\gamma^{+/+}$  mice; our experiments showed reduced Mac-3<sup>+</sup> stained lesion area and absolute numbers of CD3<sup>+</sup> T cells in  $LDLR^{-/-}p110\gamma^{-/-}$  vs.  $LDLR^{-/-}p110\gamma^{+/+}$  mice. As atherosclerotic lesions were smaller in  $LDLR^{-/-}p110\gamma^{-/-}$  than in  $LDLR^{-/-}p110\gamma^{+/+}$  mice, however, macro-

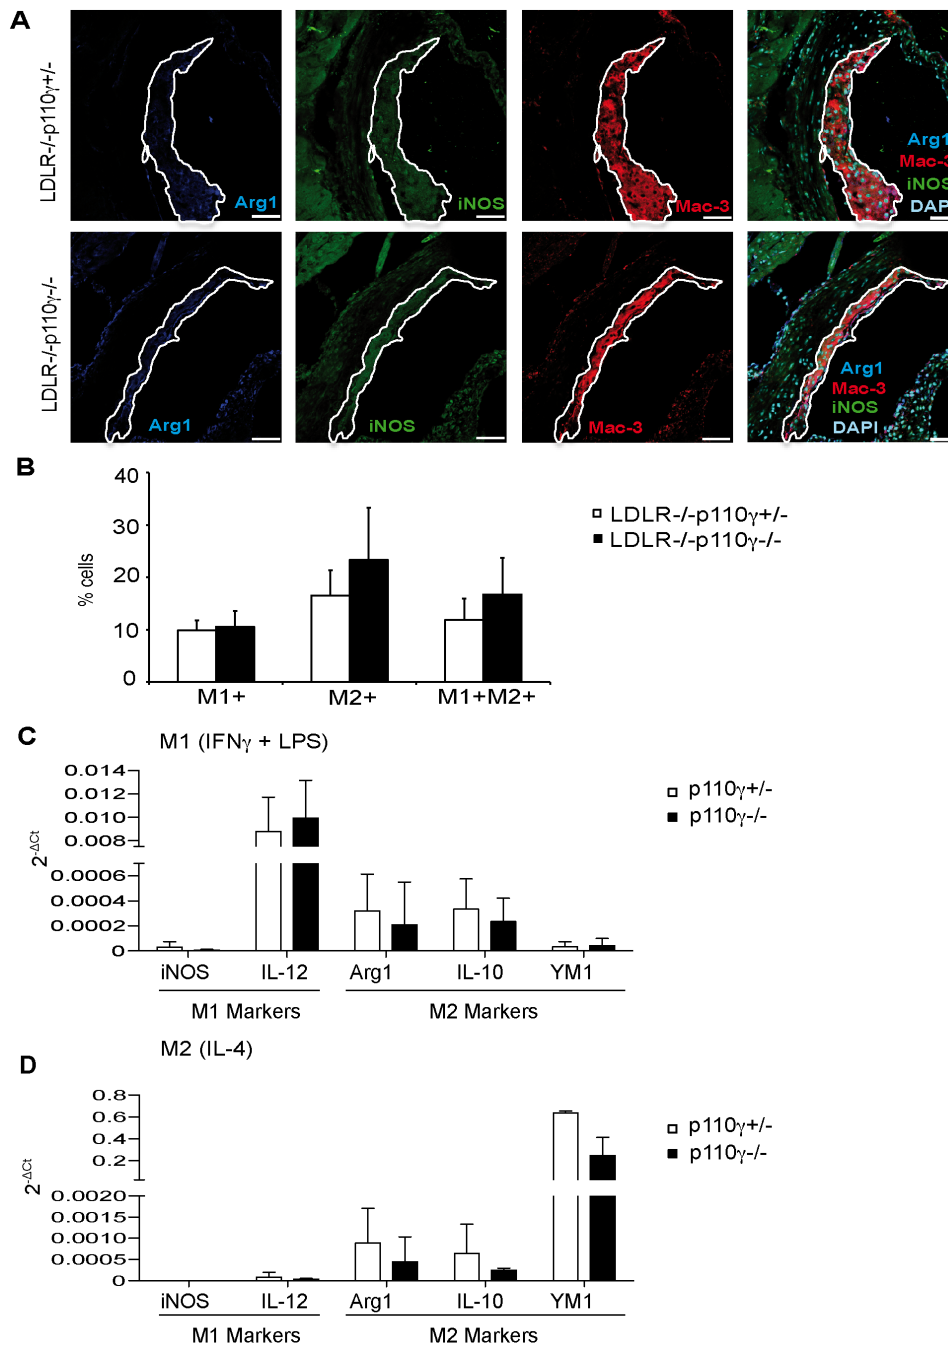

**Figure 5. M1 and M2 macrophage populations are similar in LDLR<sup>-/-</sup>p110 $\gamma$ <sup>+/-</sup> and LDLR<sup>-/-</sup>p110 $\gamma$ <sup>-/-</sup> mice.** (A) Representative photomicrographs of immunofluorescent-stained M1 (iNOS<sup>+</sup>) and M2 (arginase1<sup>+</sup>) macrophages in aortic sinus sections from LDLR<sup>-/-</sup>p110 $\gamma$ <sup>+/-</sup> and LDLR<sup>-/-</sup>p110 $\gamma$ <sup>-/-</sup> mice fed a two-month high-fat diet ( $n=5$ /genotype). Bar=50  $\mu$ m. (B) Quantification of the percentage of M1<sup>+</sup> (iNOS<sup>+</sup>), M2<sup>+</sup> (arginase1<sup>+</sup>) and M1<sup>+</sup>M2<sup>+</sup> (iNOS<sup>+</sup>arginase1<sup>+</sup>) macrophage subsets relative to total macrophages in aortic plaques. Mean  $\pm$  SD; Student's  $t$ -test. Expression of M1 (iNOS, IL-12) and M2 markers (arginase1, YM1, IL-10) was analyzed by qRT-PCR in BMM stimulated with (C) IFN $\gamma$ +LPS (M1) ( $n=4$  experiments, 3 mice/genotype) or (D) IL-4 (M2) ( $n=4$  experiments, 3 mice/genotype); marker expression is shown as RQ values. RQ=2<sup>- $\Delta$ CT</sup>. doi:10.1371/journal.pone.0072674.g005

phage area and T cell number relative to total lesion area were similar in the two strains. These data coincide with the unchanged macrophage density in ApoE<sup>-/-</sup>p110 $\gamma$ <sup>-/-</sup> compared to ApoE<sup>-/-</sup>p110 $\gamma$ <sup>+/-</sup> lesions [21], but differ from the data for irradiated LDLR<sup>-/-</sup> mice reconstituted with p110 $\gamma$ <sup>-/-</sup> bone marrow, which showed a marked decrease in macrophage and T cell infiltration (40% reduction) relative to total lesion area [29]. The

differences between the data from LDLR<sup>-/-</sup>p110 $\gamma$ <sup>-/-</sup> and ApoE<sup>-/-</sup>p110 $\gamma$ <sup>-/-</sup> mice, and those from irradiated LDLR<sup>-/-</sup> mice reconstituted with p110 $\gamma$ <sup>-/-</sup> bone marrow could reflect a p110 $\gamma$  function in lymphoid organ reconstitution, in addition to its role in infiltration. Flow cytometry analysis showed similar percentages of circulating immune cell populations (before and after high-fat diet) in LDLR<sup>-/-</sup>p110 $\gamma$ <sup>+/-</sup> and LDLR<sup>-/-</sup>p110 $\gamma$ <sup>-/-</sup>

$\gamma^{-/-}$  mice, except for neutrophils, which were increased in  $\text{LDLR}^{-/-}$   $\text{p110}\gamma^{-/-}$  mice (Supplement S1, Figure S4), coinciding with the  $\text{p110}\gamma^{-/-}$  mouse phenotype [38].

Low Treg cell numbers in atherosclerotic lesions are reported in  $\text{LDLR}^{-/-}$  mice [41] and humans [6]. We observed few  $\text{Foxp3}^{+}$  cells in early lesions of  $\text{LDLR}^{-/-}$   $\text{p110}\gamma^{+/+}$  and  $\text{LDLR}^{-/-}$   $\text{p110}\gamma^{-/-}$  mice (Table S1), which did not permit differentiation between genotypes. Because oxLDL downregulates  $\text{Foxp3}$  expression in mouse effector cells *in vitro* [42], oxLDL accumulation in lesions could explain the low  $\text{Foxp3}^{+}$  cell numbers. oxLDL in arterial walls might inhibit Treg cell function, contributing to chronicity [42]. Our data indicate that  $\text{p110}\gamma$  does not affect Treg cell infiltration into atherosclerotic plaques.

Macrophage proliferation in lesions promotes more rapid atherosclerosis progression [15]. Our studies of aortic sections showed a lower percentage of proliferating macrophages in  $\text{LDLR}^{-/-}$   $\text{p110}\gamma^{-/-}$  than in  $\text{LDLR}^{-/-}$   $\text{p110}\gamma^{+/+}$  mice, although there were no differences in T cell proliferation between the two genotypes. We complemented *in vivo* analysis of macrophage proliferation with *in vitro* experiments using BMM. Whereas GM-CSF-induced proliferation was similar in BMM from  $\text{p110}\gamma^{+/+}$  and  $\text{p110}\gamma^{-/-}$  mice (Figure S2), proliferation was reduced and S phase entry delayed in M-CSF-stimulated  $\text{LDLR}^{-/-}$   $\text{p110}\gamma^{-/-}$  compared with control  $\text{LDLR}^{-/-}$   $\text{p110}\gamma^{+/+}$  BMM (Figure 2E), reflecting a specific  $\text{p110}\gamma$  function in these processes after M-CSF signaling.

A role for  $\text{p110}\gamma$  is proposed for proliferation of T cells [26], [43], B cells [44], cancer cells from medulloblastoma [45] and hepatocellular carcinoma [46], although the underlying mechanisms remain largely unknown. In macrophages, M-CSF-mediated proliferation is inhibited when intracellular cAMP levels increase [47], leading to cell cycle arrest in G1 [35], [48]. Because  $\text{p84/p87}^{\text{PIKAP}}$ , the regulatory subunit of class  $\text{I}_B$  PI3K, is expressed at high levels in mouse macrophages, and the macromolecular complex  $\text{p84/p110}\gamma/\text{PDE3B}$  reduces cAMP levels [32], [33],  $\text{p110}\gamma$  might regulate basal cAMP levels in macrophages through formation of this complex. In microglial cells,  $\text{p110}\gamma$  controls basal intracellular cAMP and p-CREB levels [34]. M-CSF-stimulated  $\text{LDLR}^{-/-}$   $\text{p110}\gamma^{-/-}$  BMM proliferated less than control  $\text{LDLR}^{-/-}$   $\text{p110}\gamma^{+/+}$  BMM (Figure 2E); we thus propose that in the case of  $\text{LDLR}^{-/-}$   $\text{p110}\gamma^{+/+}$  macrophages, formation of a complete  $\text{p84/p110}\gamma/\text{PDE3B}$  complex maintains low basal intracellular cAMP levels, allowing M-CSF-induced proliferation. In  $\text{LDLR}^{-/-}$   $\text{p110}\gamma^{-/-}$  macrophages, formation of an incomplete  $\text{p84/p110}\gamma/\text{PDE3B}$  complex, which normally represses cAMP production, leads to higher basal cAMP levels, which reduce M-CSF-induced proliferation. The higher basal cAMP levels in  $\text{LDLR}^{-/-}$   $\text{p110}\gamma^{-/-}$  than in  $\text{LDLR}^{-/-}$   $\text{p110}\gamma^{+/+}$  BMM (Figure 4) correlated with their proliferation rates, which supports this view.

Apoptosis was measured by TUNEL (Figure 3A) and cleaved caspase-3 (Figure 3B) immunofluorescent staining. Apoptosis was unaffected in  $\text{LDLR}^{-/-}$   $\text{p110}\gamma^{+/+}$  compared to  $\text{LDLR}^{-/-}$   $\text{p110}\gamma^{-/-}$  mouse lesions (Figure 3), although there was a tendency toward less apoptosis in  $\text{LDLR}^{-/-}$   $\text{p110}\gamma^{-/-}$  lesions. This tendency might reflect a delay in lesion progression in  $\text{LDLR}^{-/-}$   $\text{p110}\gamma^{-/-}$  mice, which have less advanced plaques than  $\text{LDLR}^{-/-}$   $\text{p110}\gamma^{+/+}$  mice after the same time on a high fat diet. Apoptosis rates after the two-month diet were low in  $\text{LDLR}^{-/-}$   $\text{p110}\gamma^{+/+}$  and  $\text{LDLR}^{-/-}$   $\text{p110}\gamma^{-/-}$  mice, possibly because lesions developed at this stage are still early lesions and apoptotic cells would be correctly efferocytosed, a process that worsens with lesion severity and leads to apoptotic cell accumulation [49]. We stained  $\alpha\text{SMA}$  to detect VSMC in  $\text{LDLR}^{-/-}$   $\text{p110}\gamma^{+/+}$  and

$\text{LDLR}^{-/-}$   $\text{p110}\gamma^{-/-}$  aortic sections, and found no differences in the percentage of  $\alpha\text{SMA}^{+}$  staining relative to total lesion area in either genotype (Figure 1E, 1F). As VSMC are not reduced in  $\text{LDLR}^{-/-}$   $\text{p110}\gamma^{-/-}$  plaques, these cells might not have the proliferative defect found in  $\text{LDLR}^{-/-}$   $\text{p110}\gamma^{-/-}$  macrophages; this suggests that the proliferative disorder is cell type-specific.

Macrophages undergo classical activation in response to LPS and  $\text{IFN}\gamma$ , as part of the Th1 response (M1), or alternative activation in response to IL-4 as part of the Th2 response (M2) [50]. Advanced lesions in old ApoE-null mice show a prevalence of M1 over M2 macrophages, suggesting that the M2 phenotype is atheroprotective [13]. In activated primary macrophages, expression of M2-related genes (*Arg-1*, *Il-10*, *Il13ra*, *Msr1*) depends on CREB-induced expression of *Cebpb* (a gene that encodes a protein important for macrophage antibacterial activity) [36]. High cAMP levels could thus be linked to M2 macrophage polarization. Our data from  $\text{LDLR}^{-/-}$   $\text{p110}\gamma^{+/+}$  and  $\text{LDLR}^{-/-}$   $\text{p110}\gamma^{-/-}$  mice showed no significant differences in the relative number of M1 and M2 macrophages in atherosclerotic lesions, although there was a tendency toward increased percentages of M2 macrophages in  $\text{LDLR}^{-/-}$   $\text{p110}\gamma^{-/-}$  compared to  $\text{LDLR}^{-/-}$   $\text{p110}\gamma^{+/+}$  mice (Figure 5B). Likewise, *in vitro* macrophage polarization was unaffected when we compared  $\text{p110}\gamma^{+/+}$  and  $\text{p110}\gamma^{-/-}$  BMM, which showed similar M1 and M2 marker expression.

Our results suggest that in addition to affecting macrophage infiltration [21], [29],  $\text{p110}\gamma$  deletion specifically alters *in situ* macrophage proliferation in atherosclerotic lesions. In  $\text{p110}\gamma^{-/-}$  macrophages, higher basal cAMP levels reduce M-CSF-induced proliferation. In contrast,  $\text{p110}\gamma$  has no role in M1/M2 macrophage differentiation or in apoptosis. Our findings confirm a mechanism by which atherosclerotic lesions can be reduced, and highlight  $\text{p110}\gamma$  as a potential target for treatment of inflammatory diseases.

## Supporting Information

### Figure S1 Mice lacking LDLR and PI3K p110γ show smaller atherosclerotic lesions than controls.

Lesion progression was studied in  $\text{LDLR}^{-/-}$   $\text{p110}\gamma^{+/+}$  and  $\text{LDLR}^{-/-}$   $\text{p110}\gamma^{-/-}$  mice before ( $t=0$ ) and after ( $t=2$  months) high-fat diet treatment. (A) Total serum cholesterol, HDL- and LDL-cholesterol and triglycerides were measured.  $t=0$ ,  $n=10$  mice/genotype;  $t=2$  months,  $n=6$  mice/genotype. Mean  $\pm$  SD. Student's  $t$ -test,  $p<0.05$  (B) Representative photomicrographs of hematoxylin/eosin-stained aortic sinus sections from  $\text{LDLR}^{-/-}$   $\text{p110}\gamma^{+/+}$  and  $\text{LDLR}^{-/-}$   $\text{p110}\gamma^{-/-}$  female mice. Lesion area is delimited. Bar = 200  $\mu\text{m}$ . (C) Quantitative analysis of lesion size in the aortic sinus of  $\text{LDLR}^{-/-}$   $\text{p110}\gamma^{+/+}$  ( $n=6$ ) and  $\text{LDLR}^{-/-}$   $\text{p110}\gamma^{-/-}$  mice ( $n=6$ ) using ImageJ. Mean  $\pm$  SD. Student's  $t$ -test,  $p<0.05$ . (D) Mac-3<sup>+</sup> area per aortic sinus section, quantitated with ImageJ. Mean  $\pm$  SD; Student's  $t$ -test,  $p<0.05$ . (E) Absolute numbers of lesion CD3<sup>+</sup> cells per aortic sinus section, quantitated with ImageJ. Mean  $\pm$  SD; Poisson test,  $p<0.01$ . (TIF)

### Figure S2 Proliferation of GM-CSF-stimulated macrophages is unaffected by p110γ deficiency.

Percentage of BMM in cell cycle S phase at various times post-GM-CSF stimulation in  $\text{p110}\gamma^{+/+}$  and  $\text{p110}\gamma^{-/-}$  BMM ( $n=2$  experiments, each with a pool of 3 mice/genotype). (TIF)

### Figure S3 Intracellular cAMP levels in p110γ<sup>+/+</sup> BMM increase after forskolin stimulation.

Western blot of BMM



extracts from p110 $\gamma^{+/-}$  mice, to detect protein-bound cAMP after forskolin (FSK) stimulation (0, 24 and 48 h). (TIF)

**Figure S4 Immune cell populations and M-CSF concentration in peripheral blood from LDLR $^{-/-}$ p110 $\gamma^{+/-}$  and LDLR $^{-/-}$ p110 $\gamma^{-/-}$  mice.** Peripheral blood was extracted from LDLR $^{-/-}$ p110 $\gamma^{+/-}$  and LDLR $^{-/-}$ p110 $\gamma^{-/-}$  mice before (t = 0) and after (t = 2 months) on a high-fat diet. Flow cytometry staining was used to detect T cells (CD3 $^{+}$ ) (**A**), inflammatory monocytes (Ly6C $^{hi}$ ) (**B**) and granulocytes (Gr1 $^{+}$ ) (**C**) (n = 7 mice/genotype, t = 0; n = 4 mice/genotype, t = 2 months). Mean  $\pm$  SD, Student's *t*-test, p < 0.05 and p < 0.01. (**D**) In serum from peripheral blood obtained as above, M-CSF levels were determined by ELISA using the Milliplex Kit (Millipore). Mean  $\pm$  SD. Student's *t*-test. (TIF)

**Table S1 Foxp3 $^{+}$  regulatory T cells infiltrate in atherosclerotic lesions from LDLR $^{-/-}$ p110 $\gamma^{+/-}$  and LDLR $^{-/-}$ p110 $\gamma^{-/-}$  mice.** Quantitative analysis of Foxp3 $^{+}$  cells per aortic sinus section of indicated mice (n = 8/genotype). Results show mean  $\pm$  SD.

## References

- Hansson GK, Libby P (2006) The immune response in atherosclerosis: a double-edged sword. *Nat Rev Immunol* 6: 508–519.
- Galkina E, Ley K (2009) Immune and inflammatory mechanisms of atherosclerosis (\*). *Annu Rev Immunol* 27: 165–197.
- Lusis AJ (2000) Atherosclerosis. *Nature* 407: 233–241.
- Witztum JL, Palinski W (1999) Are immunological mechanisms relevant for the development of atherosclerosis? *Clin Immunol* 90: 153–156.
- Weber C, Noels H (2011) Atherosclerosis: current pathogenesis and therapeutic options. *Nat Med* 17: 1410–1422.
- de Boer OJ, van der Meer JJ, Teeling P, van der Loos CM, van der Wal AC (2007) Low numbers of FOXP3 positive regulatory T cells are present in all developmental stages of human atherosclerotic lesions. *PLoS One* 2: e779.
- Moore KJ, Tabas I (2011) Macrophages in the pathogenesis of atherosclerosis. *Cell* 145: 341–355.
- Zernecke A, Shagdarsuren E, Weber C (2008) Chemokines in atherosclerosis: an update. *Arterioscler Thromb Vasc Biol* 28: 1897–1908.
- Gordon S, Taylor PR (2005) Monocyte and macrophage heterogeneity. *Nat Rev Immunol* 5: 953–964.
- Falk LA, Vogel SN (1988) Comparison of bone marrow progenitors responsive to granulocyte-macrophage colony stimulating factor and macrophage colony stimulating factor-1. *J Leukoc Biol* 43: 148–157.
- Hamilton JA (2008) Colony-stimulating factors in inflammation and autoimmunity. *Nat Rev Immunol* 8: 533–544.
- Johnson JL, Newby AC (2009) Macrophage heterogeneity in atherosclerotic plaques. *Curr Opin Lipidol* 20: 370–378.
- Khallou-Laschet J, Varthaman A, Fornasa G, Compain C, Gaston AT, et al. (2010) Macrophage plasticity in experimental atherosclerosis. *PLoS One* 5: e8852.
- Antonov AS, Munn DH, Kolodgie FD, Virmani R, Gerrity RG (1997) Aortic endothelial cells regulate proliferation of human monocytes in vitro via a mechanism synergistic with macrophage colony-stimulating factor. Convergence at the cyclin E/p27(Kip1) regulatory checkpoint. *J Clin Invest* 99: 2867–2876.
- Sakai M, Kobori S, Miyazaki A, Horiuchi S (2000) Macrophage proliferation in atherosclerosis. *Curr Opin Lipidol* 11: 503–509.
- Seimon T, Tabas I (2009) Mechanisms and consequences of macrophage apoptosis in atherosclerosis. *J Lipid Res* 50 Suppl: S382–387.
- Biwa T, Sakai M, Shichiri M, Horiuchi S (2000) Granulocyte/macrophage colony-stimulating factor plays an essential role in oxidized low density lipoprotein-induced macrophage proliferation. *J Atheroscler Thromb* 7: 14–20.
- Rajavashisth TB, Andalibi A, Territo MC, Berliner JA, Navab M, et al. (1990) Induction of endothelial cell expression of granulocyte and macrophage colony-stimulating factors by modified low-density lipoproteins. *Nature* 344: 254–257.
- Lamharzi N, Renard CB, Kramer F, Pennathur S, Heinecke JW, et al. (2004) Hyperlipidemia in concert with hyperglycemia stimulates the proliferation of macrophages in atherosclerotic lesions: potential role of glucose-oxidized LDL. *Diabetes* 53: 3217–3225.
- Biwa T, Sakai M, Matsumura T, Kobori S, Kaneko K, et al. (2000) Sites of action of protein kinase C and phosphatidylinositol 3-kinase are distinct in oxidized low density lipoprotein-induced macrophage proliferation. *J Biol Chem* 275: 5810–5816.
- Chang JD, Sukhova GK, Libby P, Schwartz E, Lichtenstein AH, et al. (2007) Deletion of the phosphoinositide 3-kinase p110 $\gamma$  gene attenuates murine atherosclerosis. *Proc Natl Acad Sci USA* 104: 8077–8082.
- Varticovski L, Druker B, Morrison D, Cantley L, Roberts T (1989) The colony stimulating factor-1 receptor associates with and activates phosphatidylinositol-3 kinase. *Nature* 342: 699–702.
- Kelley TW, Graham MM, Doseff AI, Pomerantz RW, Lau SM, et al. (1999) Macrophage colony-stimulating factor promotes cell survival through Akt/protein kinase B. *J Biol Chem* 274: 26393–26398.
- Saleem A, Kharbada S, Yuan ZM, Kufe D (1995) Monocyte colony-stimulating factor stimulates binding of phosphatidylinositol 3-kinase to Grb2.Sos complexes in human monocytes. *J Biol Chem* 270: 10380–10383.
- Vanhaesebroeck B, Ali K, Bilancio A, Geering B, Foukas LC (2005) Signalling by PI3K isoforms: insights from gene-targeted mice. *Trends Biochem Sci* 30: 194–204.
- Sasaki T, Irie-Sasaki J, Jones RG, Oliveira-dos-Santos AJ, Stanford WL, et al. (2000) Function of PI3K $\gamma$  in thymocyte development, T cell activation, and neutrophil migration. *Science* 287: 1040–1046.
- Barber DF, Bartolome A, Hernandez C, Flores JM, Fernandez-Arias C, et al. (2006) Class IB-phosphatidylinositol 3-kinase (PI3K) deficiency ameliorates IA-PI3K-induced systemic lupus but not T cell invasion. *J Immunol* 176: 589–593.
- Martin AL, Schwartz MD, Jameson SC, Shimizu Y (2008) Selective regulation of CD8 effector T cell migration by the p110 gamma isoform of phosphatidylinositol 3-kinase. *J Immunol* 180: 2081–2088.
- Fougerat A, Gayral S, Gourdy P, Schambourg A, Ruckle T, et al. (2008) Genetic and pharmacological targeting of phosphoinositide 3-kinase-gamma reduces atherosclerosis and favors plaque stability by modulating inflammatory processes. *Circulation* 117: 1310–1317.
- Jones GE, Prigmore E, Calvez R, Hogan C, Dunn GA, et al. (2003) Requirement for PI 3-kinase gamma in macrophage migration to MCP-1 and CSF-1. *Exp Cell Res* 290: 120–131.
- Gobert Gosse S, Bourgin C, Liu WQ, Garbay C, Mouchiroud G (2005) M-CSF stimulated differentiation requires persistent MEK activity and MAPK phosphorylation independent of Grb2-Sos association and phosphatidylinositol 3-kinase activity. *Cell Signal* 17: 1352–1362.
- Patrucco E, Notte A, Barberis L, Selvetella G, Maffei A, et al. (2004) PI3K $\gamma$  modulates the cardiac response to chronic pressure overload by distinct kinase-dependent and -independent effects. *Cell* 118: 375–387.
- Voigt P, Dörner MB, Schaefer M (2006) Characterization of p87PIKAP, a novel regulatory subunit of phosphoinositide 3-kinase gamma that is highly expressed in heart and interacts with PDE3B. *J Biol Chem* 281: 9977–9986.
- Schmidt C, Schneble N, Muller JP, Bauer R, Perino A, et al. (2013) Phosphoinositide 3-kinase gamma mediates microglial phagocytosis via lipid kinase-independent control of cAMP. *Neuroscience* 233: 44–53.
- Xaus J, Vallerod AF, Cardo M, Marques L, Beleta J, et al. (1999) Adenosine inhibits macrophage colony-stimulating factor-dependent proliferation of macrophages through the induction of p27kip-1 expression. *J Immunol* 163: 4140–4149.
- Ruffell D, Mourikioti F, Gambardella A, Kirstetter P, Lopez RG, et al. (2009) A CREB-C/EBP $\beta$  cascade induces M2 macrophage-specific gene expression and promotes muscle injury repair. *Proc Natl Acad Sci USA* 106: 17475–17480.
- Ishibashi S, Brown MS, Goldstein JL, Gerard RD, Hammer RE, et al. (1993) Hypercholesterolemia in low density lipoprotein receptor knockout mice and its reversal by adenovirus-mediated gene delivery. *J Clin Invest* 92: 883–893.

(DOC)

## Supplement S1 Supporting Materials and Methods, Results and References.

(DOC)

## Acknowledgments

We thank R Mejías, J Sánchez-Ruiz, A Suárez-Fueyo, A Franco and M Tardáguila for primers, protocols and helpful suggestions, MJ Andrés-Manzano for excellent technical assistance, S Gutiérrez for help with image quantification, L Almonacid for qRT-PCR studies, CO Sánchez for statistical advice and C Mark for editorial assistance.

## Author Contributions

Conceived and designed the experiments: TMZ CFA JFF VA DFB. Performed the experiments: TMZ CFA JFF RS SPY DFB. Analyzed the data: TMZ CFA JFF RS SPY EH MW ACC VA DFB. Contributed reagents/materials/analysis tools: EH MW ACC. Wrote the paper: TMZ JFF VA DFB.

38. Hirsch E, Katanaev VL, Garlanda C, Azzolino O, Pirola L, et al. (2000) Central role for G protein-coupled phosphoinositide 3-kinase  $\gamma$  in inflammation. *Science* 287: 1049–1053.
39. Douglas MR, Morrison KC, Jacques SJ, Leadbeater WE, Gonzalez AM, et al. (2009) Off-target effects of epidermal growth factor receptor antagonists mediate retinal ganglion cell disinhibited axon growth. *Brain* 132: 3102–3121.
40. Kwon EM, Raines MA, Blenis J, Sakamoto KM (2000) Granulocyte-macrophage colony-stimulating factor stimulation results in phosphorylation of cAMP response element-binding protein through activation of pp90RSK. *Blood* 95: 2552–2558.
41. Gotsman I, Grabie N, Gupta R, Dacosta R, MacConmara M, et al. (2006) Impaired regulatory T-cell response and enhanced atherosclerosis in the absence of inducible costimulatory molecule. *Circulation* 114: 2047–2055.
42. Mor A, Planer D, Luboshits G, Afek A, Metzger S, et al. (2007) Role of naturally occurring CD4<sup>+</sup> CD25<sup>+</sup> regulatory T cells in experimental atherosclerosis. *Arterioscler Thromb Vasc Biol* 27: 893–900.
43. Alcazar I, Marques M, Kumar A, Hirsch E, Wymann M, et al. (2007) Phosphoinositide 3-kinase  $\gamma$  participates in T cell receptor-induced T cell activation. *J Exp Med* 204: 2977–2987.
44. Beer-Hammer S, Zebedin E, von Holleben M, Alferink J, Reis B, et al. (2010) The catalytic PI3K isoforms p110 $\gamma$  and p110 $\delta$  contribute to B cell development and maintenance, transformation, and proliferation. *J Leukoc Biol* 87: 1083–1095.
45. Guerreiro AS, Fattet S, Kulesza DW, Atamer A, Elsing AN, et al. (2011) A sensitized RNA interference screen identifies a novel role for the PI3K p110 $\gamma$  isoform in medulloblastoma cell proliferation and chemoresistance. *Mol Cancer Res* 9: 925–935.
46. Dituri F, Mazzocca A, Giannelli G, Antonaci S (2011) PI3K functions in cancer progression, anticancer immunity and immune evasion by tumors. *Clin Dev Immunol* 2011: 947858.
47. Rock CO, Cleveland JL, Jackowski S (1992) Macrophage growth arrest by cyclic AMP defines a distinct checkpoint in the mid-G1 stage of the cell cycle and overrides constitutive c-myc expression. *Mol Cell Biol* 12: 2351–2358.
48. Kato JY, Matsuoka M, Polyak K, Massague J, Sherr CJ (1994) Cyclic AMP-induced G1 phase arrest mediated by an inhibitor (p27Kip1) of cyclin-dependent kinase 4 activation. *Cell* 79: 487–496.
49. Tabas I (2005) Consequences and therapeutic implications of macrophage apoptosis in atherosclerosis: the importance of lesion stage and phagocytic efficiency. *Arterioscler Thromb Vasc Biol* 25: 2255–2264.
50. Gordon S (2003) Alternative activation of macrophages. *Nat Rev Immunol* 3: 23–35.
